- thetics and of neuroleptic, neuroleptanalgesic, and sedative agents on tumor blood flow. *Radiat Res* 1988; 114:64-76
50. MacIver MB, Mikulec AA, Amagasu SM, Monroe FA: Volatile anesthetics depress glutamate transmission *via* presynaptic actions. *ANESTHESIOLOGY* 1996; 85:823-34
  51. Schlame M, Hemmings HC, Jr.: Inhibition by volatile anesthetics of endogenous glutamate release from synaptosomes by a presynaptic mechanism. *ANESTHESIOLOGY* 1995; 82:1406-16
  52. Lübke J, Albus K: The postnatal development of layer VI pyramidal neurons in the cat's striate cortex, as visualized by intracellular Lucifer yellow injections in aldehyde-fixed tissue. *Brain Res Dev Brain Res* 1989; 45:29-38
  53. Markus EJ, Petit TL: Neocortical synaptogenesis, aging, and behavior: Lifespan development in the motor-sensory system of the rat. *Exp Neurol* 1987; 96:262-78
  54. Rakic P, Bourgeois JP, Eckenhoef MF, Zecevic N, Goldman-Rakic PS: Concurrent overproduction of synapses in diverse regions of the primate cerebral cortex. *Science* 1986; 232:232-5
  55. Huttenlocher PR, Dabholkar AS: Regional differences in synaptogenesis in human cerebral cortex. *J Comp Neurol* 1997; 387:167-78
  56. Huttenlocher PR, de Courten C, Garey LJ, Van der Loos H: Synaptogenesis in human visual cortex-evidence for synapse elimination during normal development. *Neurosci Lett* 1982; 33:247-52

## ANESTHESIOLOGY REFLECTIONS

### A "Cocaine Paperweight" from C.F. Boehringer & Soehne

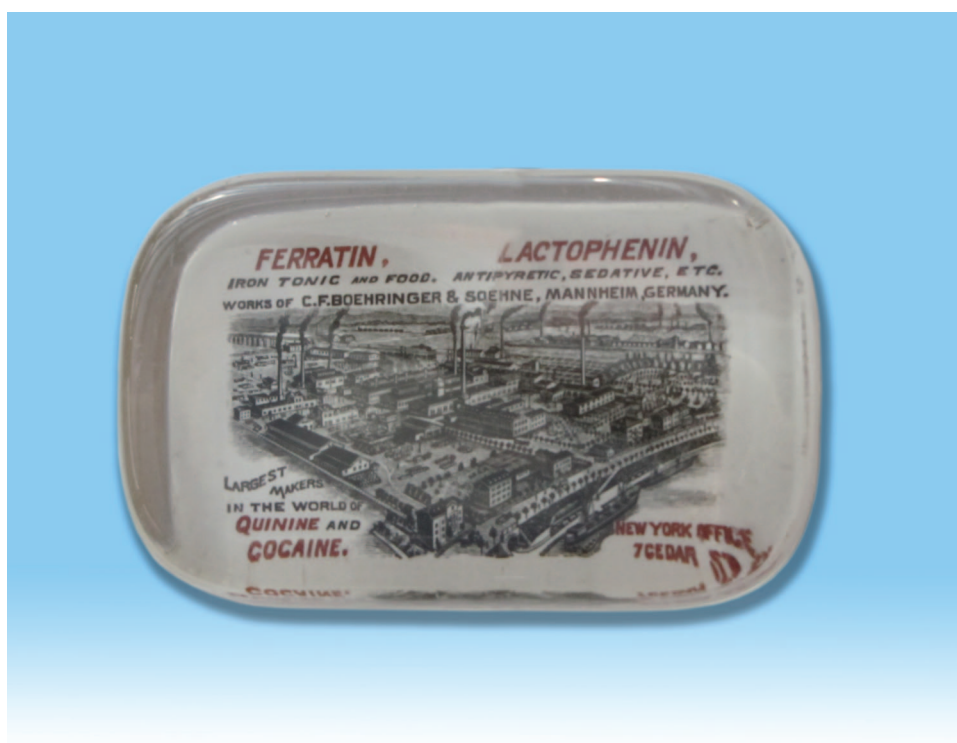

In 1859 Christian Friedrich Boehringer (1791-1867) renamed his pharmaceutical firm in Mannheim, Germany, as "C.F. Boehringer & Soehne" (B&S). As advertised on this paperweight (*above*), B&S styled itself as the "largest makers in the world of Quinine and Cocaine." The company also prided itself on distributing "beautiful, well-defined crystals." From at least 1896 to 1906, B&S boasted that the "merits of our Cocaine, as a first-class, thoroughly reliable preparation, have been distinguished by the approbation of Dr. Carl Koller, of New York [and] formerly of Vienna, the first to apply Cocaine to Medicine." Located less than 8 miles from the New York branch of B&S, ophthalmologist Koller's office likely received its share of B&S paperweights like the one above. (Copyright © the American Society of Anesthesiologists, Inc. This image also appears in the *Anesthesiology Reflections* online collection available at [www.anesthesiology.org](http://www.anesthesiology.org).)

George S. Bause, M.D., M.P.H., Honorary Curator, ASA's Wood Library-Museum of Anesthesiology, Park Ridge, Illinois, and Clinical Associate Professor, Case Western Reserve University, Cleveland, Ohio. [UJYC@aol.com](mailto:UJYC@aol.com).
